# Supplementary material for: Preparation, characterization and application of Cu–Ni/TiO2in Orange II photodegradation under visible light: effect of different reaction parameters and optimization
Source: Royal Society of Chemistry journal article supplement (doi:10.1039/c6ra10371e), 2016-01-01
Supplement: c6ra10371e1.pdf [file c6ra10371e1.pdf]

## Supplementary materials

### S 1 Orange II specifications

|                    |                                                                                                        |
|--------------------|--------------------------------------------------------------------------------------------------------|
| Commercial name    | Orange II sodium salt                                                                                  |
| Synonym            | Acid Orange 7                                                                                          |
| Classification     | Azo                                                                                                    |
| Molecular Formula  | C <sub>16</sub> H <sub>11</sub> N <sub>2</sub> O <sub>4</sub> Na                                       |
| Molecular Weight   | 350.3 g mol <sup>-1</sup>                                                                              |
| Physical form      | Dark orange-brown powder                                                                               |
| λ max              | 483-487nm                                                                                              |
| CAS Number         | 633-96-5                                                                                               |
| Color Index Number | 15510                                                                                                  |
| EC Number          | 211-199-0                                                                                              |
| MDL number         | MFCD00011657                                                                                           |
| CA Index name      | 4-(2-Hydroxy-1-naphthylazo), Benzene sulfonic acid, monosodium salt                                    |
| pH range           | 7.4 – 8.6, 10.2- 11.4                                                                                  |
| Solubility         | very soluble in water (130 mg·mL <sup>-1</sup> ), slightly soluble in ethanol (4 mg·mL <sup>-1</sup> ) |

Chemical structure

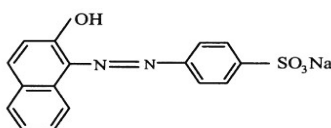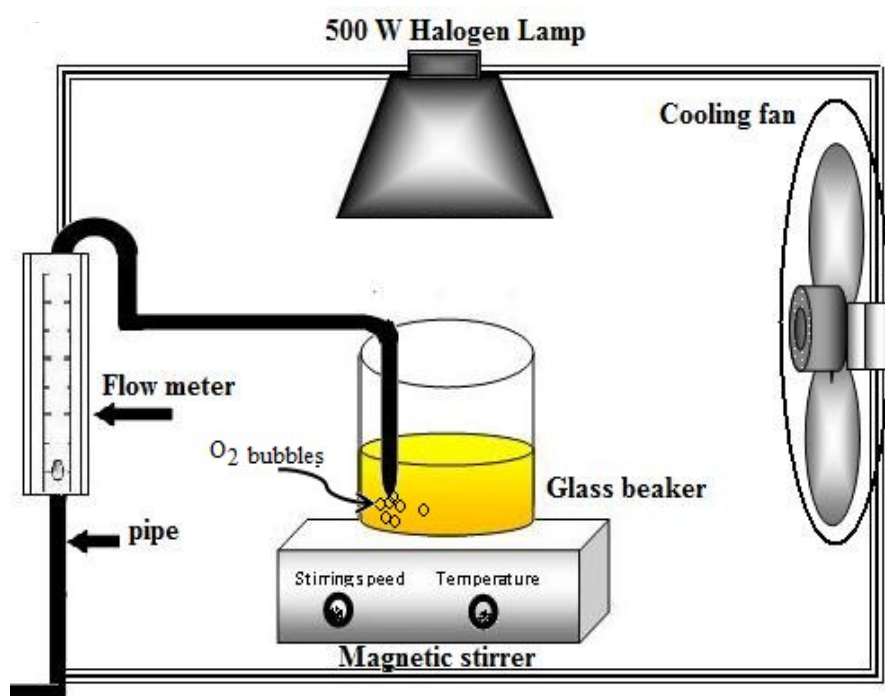

S 2 Experimental setup

S 3 Comparison of related process occurring during TGA

| Steps | Temp. range(°C) | Total drop in mass (%) | Related process occurring                                                               |
|-------|-----------------|------------------------|-----------------------------------------------------------------------------------------|
| 1     | 30–150          |                        | Evaporation of adsorbed water                                                           |
| 2     | 150–400         | 26.45                  | Decomposition of $\text{Cu}(\text{NO}_3)_2$ & $\text{Ni}(\text{NO}_3)_2$ to metal oxide |

S 4 Assignment of absorption peaks observed in FTIR spectra of bare  $\text{TiO}_2$  and  $\text{Cu:Ni/TiO}_2$  photocatalysts

| Peaks( $\text{cm}^{-1}$ ) | Possible assignment                               | Related process occurring    |
|---------------------------|---------------------------------------------------|------------------------------|
| 1600, 3400                | H–O–H bending<br>O–H stretching of hydroxyl group | Physically adsorbed moisture |
| 1384                      | $\text{NO}_3^-$ anion                             | Presence of nitrate          |

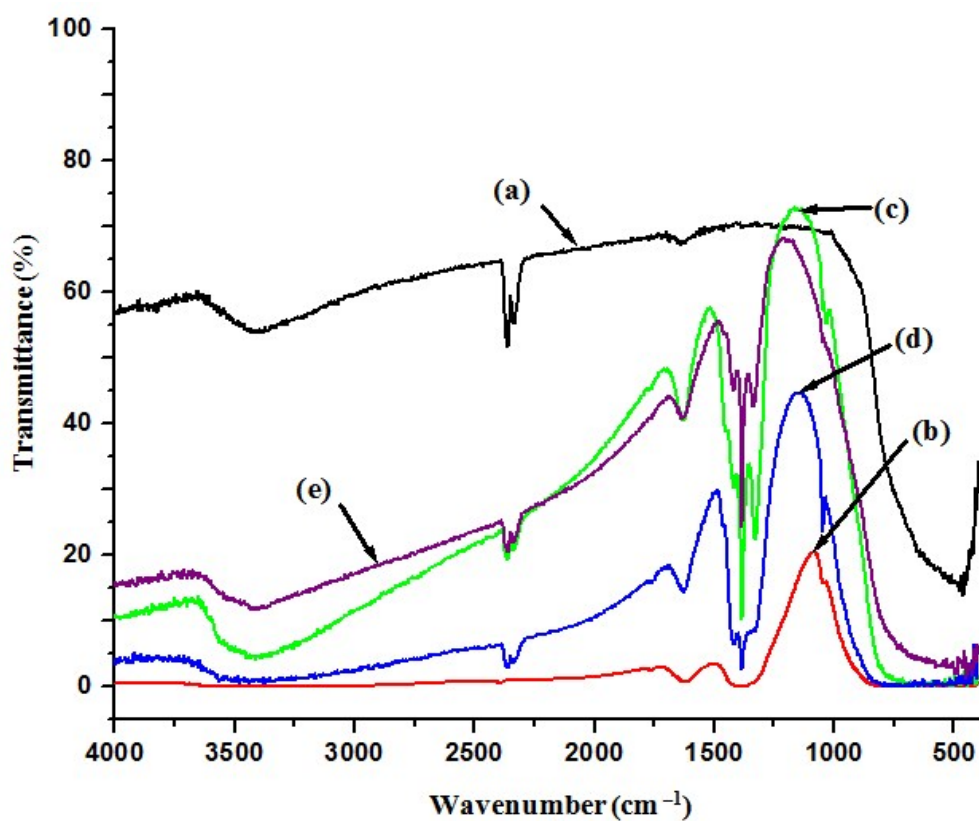

S 5 FTIR spectra of (a) bare  $\text{TiO}_2$ ; 9Cu:1Ni/ $\text{TiO}_2$  photocatalysts: (b) raw and calcined at (c) 180°C, (d) 200°C and (e) 300°C

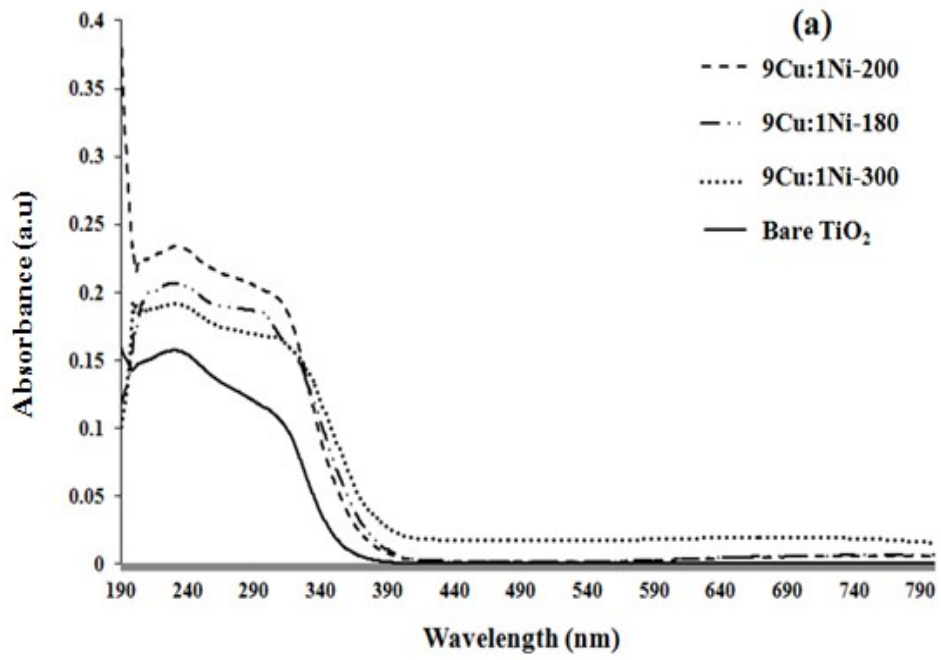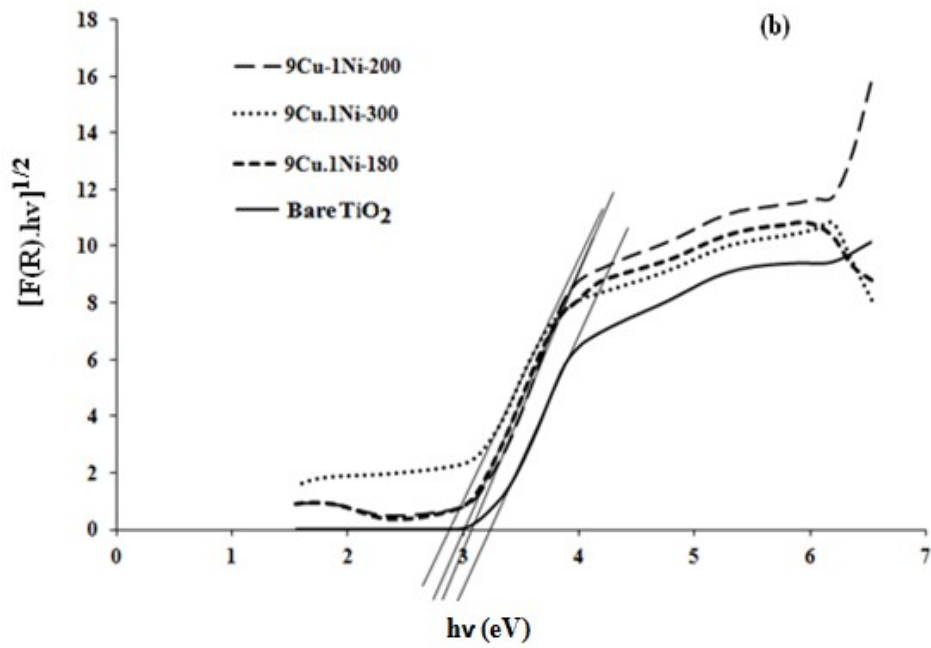

S 6 (a) Absorption spectra and (b) Plot of transformed Kubelka-Munk functions  $[F(R).hv]^{1/2}$  vs  $h\nu$  for WI photocatalysts with different calcination temperature

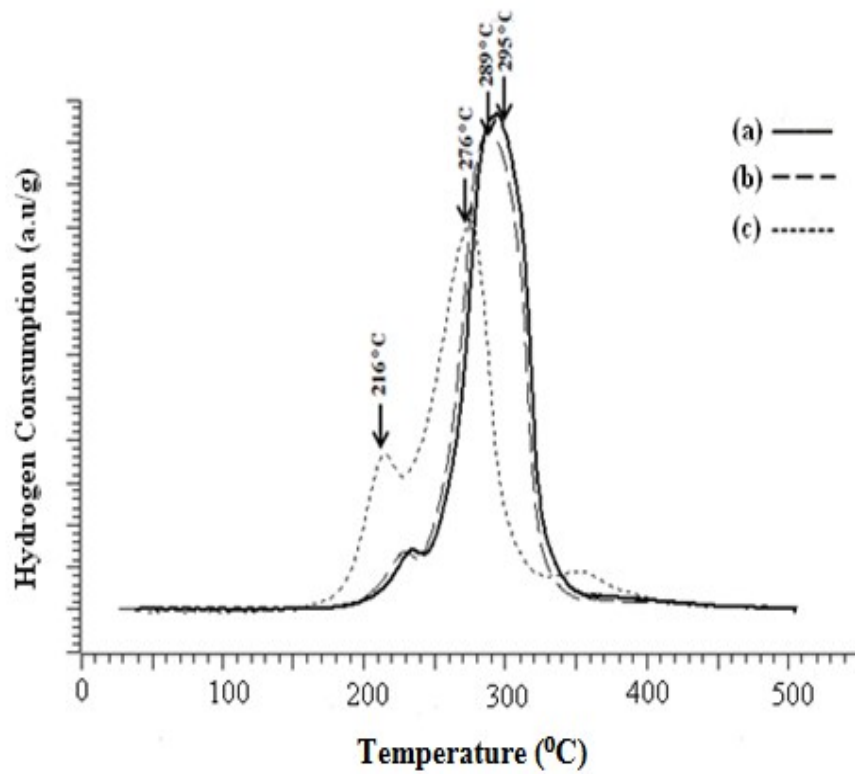

S 7 The TPR profiles of WI-9Cu:1Ni photocatalysts calcined at different temperatures (a) 9Cu:1Ni-200, (b) 9Cu:1Ni-180 and (c) 9Cu:1Ni-300

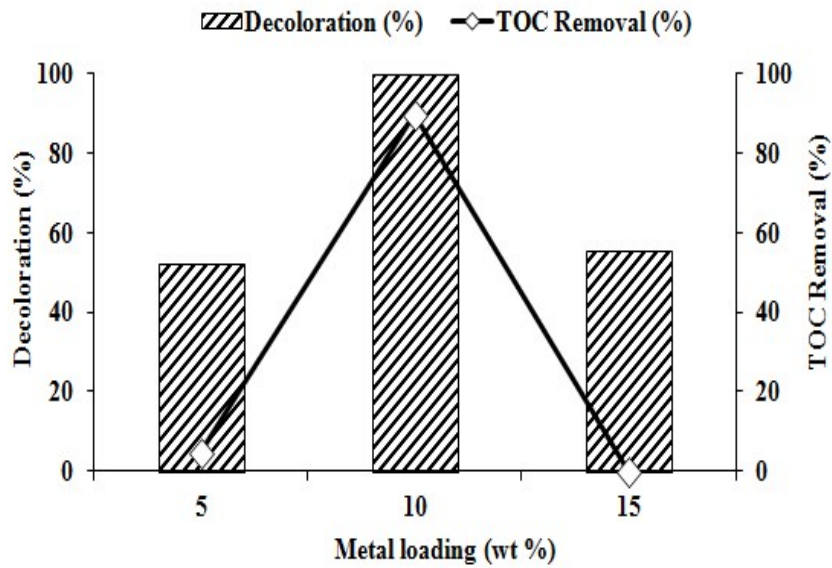

S 8 Effect of metal loading on Orange II decoloration

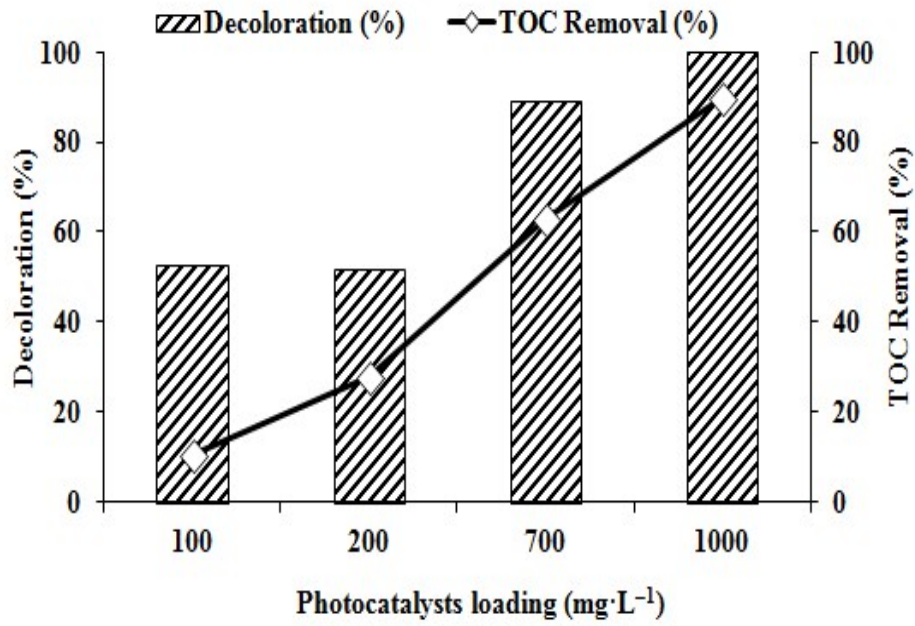

S 9 Effect of photocatalysts loading on Orange II decoloration at pH 6.8

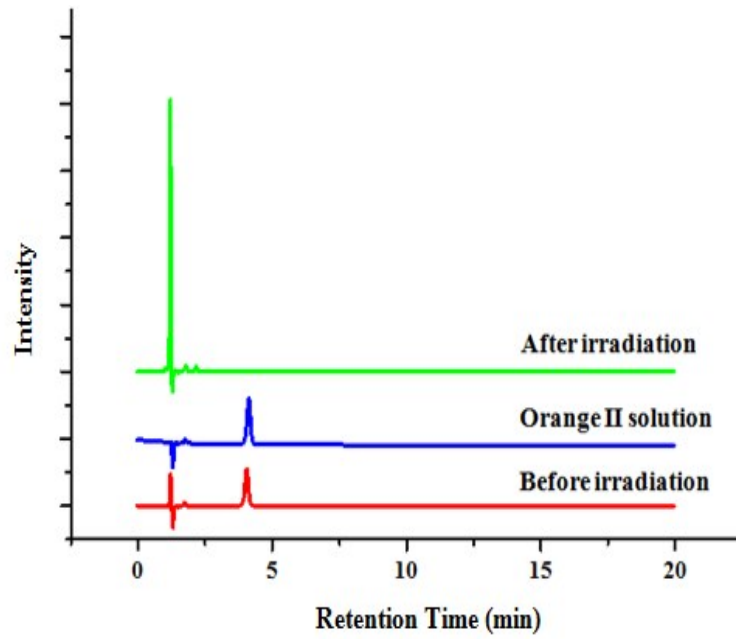

S 10 Chromatogram for Orange II and WI photocatalysts samples before and after reaction(1 h reaction duration)

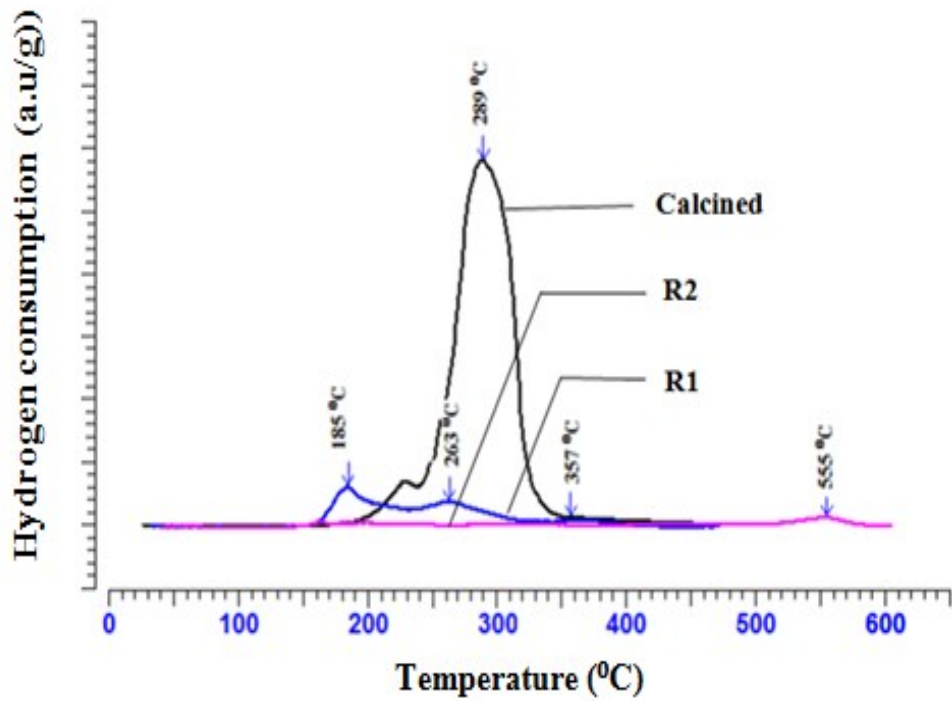

S 11 TPR profile of fresh and recycled photocatalyst

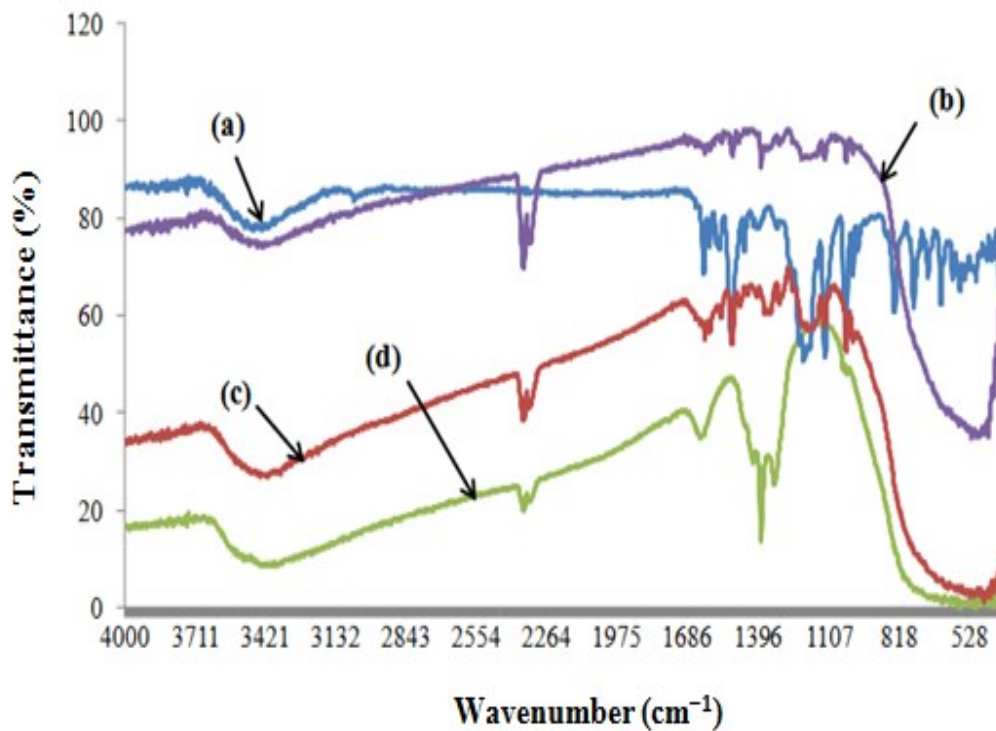

S 12 FTIR spectra of (a) Orange II and 9Cu:1Ni-200 after reaction: (b) washed, (c) unwashed and (d) 9Cu-1Ni-200 before reaction
